# Supplementary material
Source: Springer Nature journal article supplement (https://www.springermedizin.de/resource/supplementary/12879_2012_2507_MOESM5_ESM.pdf/9444722)

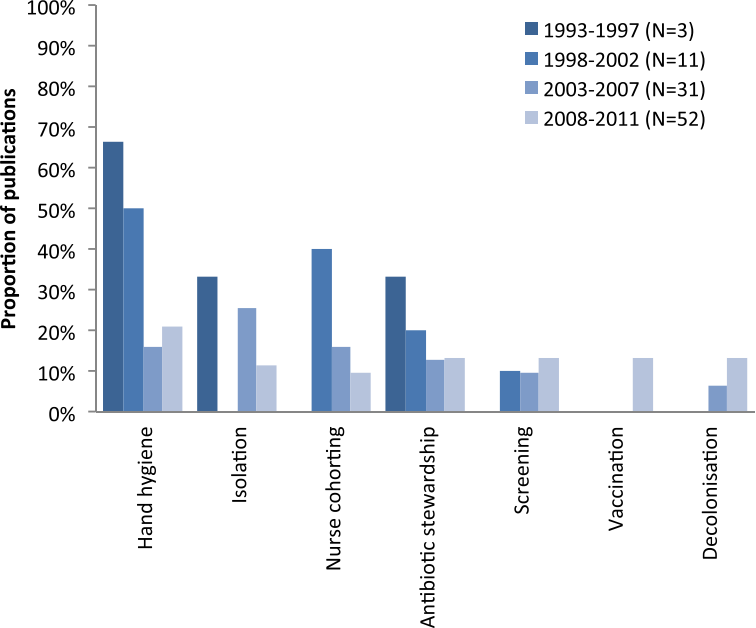

Supplement: MOESM5 [file 9444722]
